# Supplementary material
Source: PubMed Central journal article supplement (PMC2766646)
Supplement: tjp0587-4393-SD1.pdf [file tjp0587-4393-SD1.pdf]

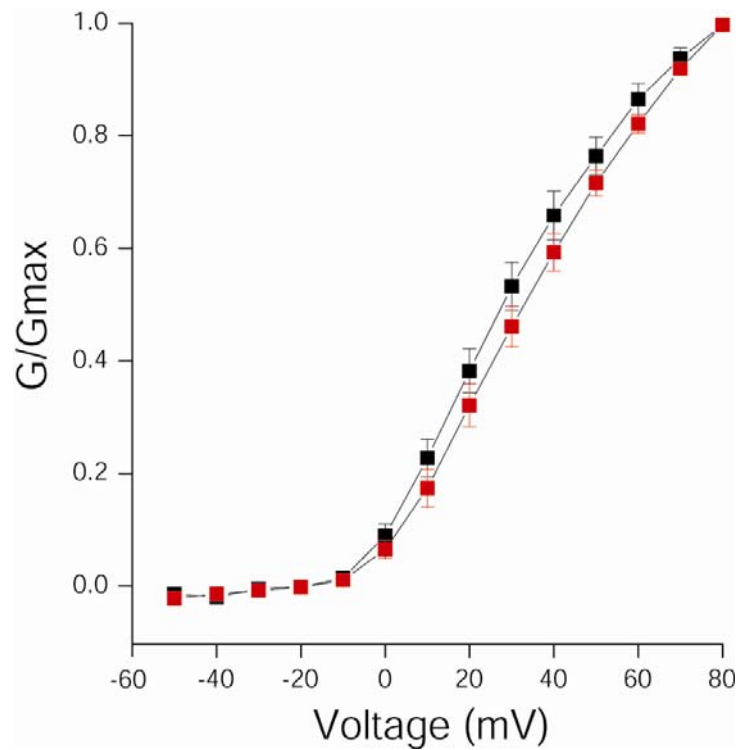

**Supplemental Figure 1.** Phenylalanine substitution at tyrosine 124 does not alter Kv2.1 channel gating properties. Normalized conductance (G/Gmax) vs. voltage (mV) profiles of wild-type Kv2.1 (black squares) and Kv2.1(Y124F) (red squares) channels are plotted above. The voltage-dependent activation profiles for both wild-type and mutant channels were nearly identical, suggesting the single amino acid substitution did not alter activation kinetics. The half-maximal activation voltage was similar for both channels:  $28.9 \pm 2.75$  mV for Kv2.1 (n=11);  $33.85 \pm 2.82$  mV for Kv2.1(Y124F) (n=8).
